# Supplementary material for: Generation of High-Titer Self-Inactivated γ-Retroviral Vector Producer Cells
Source: PubMed Central journal article supplement — Mol Ther Methods Clin Dev. 2019 Jun 7;14:90–9. doi: 10.1016/j.omtm.2019.05.013 (PMC6610700; doi:10.1016/j.omtm.2019.05.013), 2019-06-07
Supplement: mmc1.pdf [file mmc1.pdf]

**OMTM, Volume 14**

## **Supplemental Information**

### **Generation of High-Titer Self-Inactivated**

### **$\gamma$ -Retroviral Vector Producer Cells**

**Karim Ghani, Michael Boivin-Welch, Sylvie Roy, Angela Dakiw-Piaceski, Martin Barbier, Elena Pope, Lucie Germain, and Manuel Caruso**

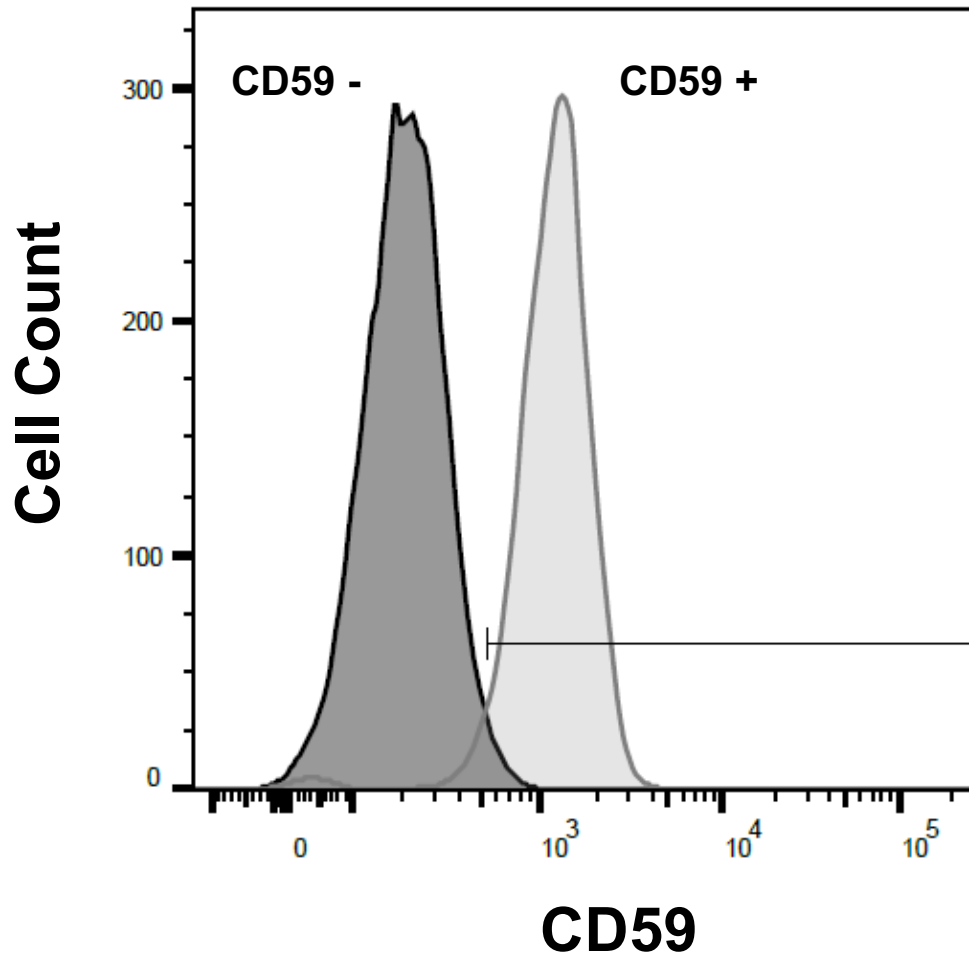

**Figure S1. CD59 expression loss in K562 cells after *PIGA* gene inactivation.** FACS analysis of K562 cells (light grey) and K562(*PIG*<sup>-</sup>) cells (dark grey) stained with an anti-CD59 antibody FITC-labeled.

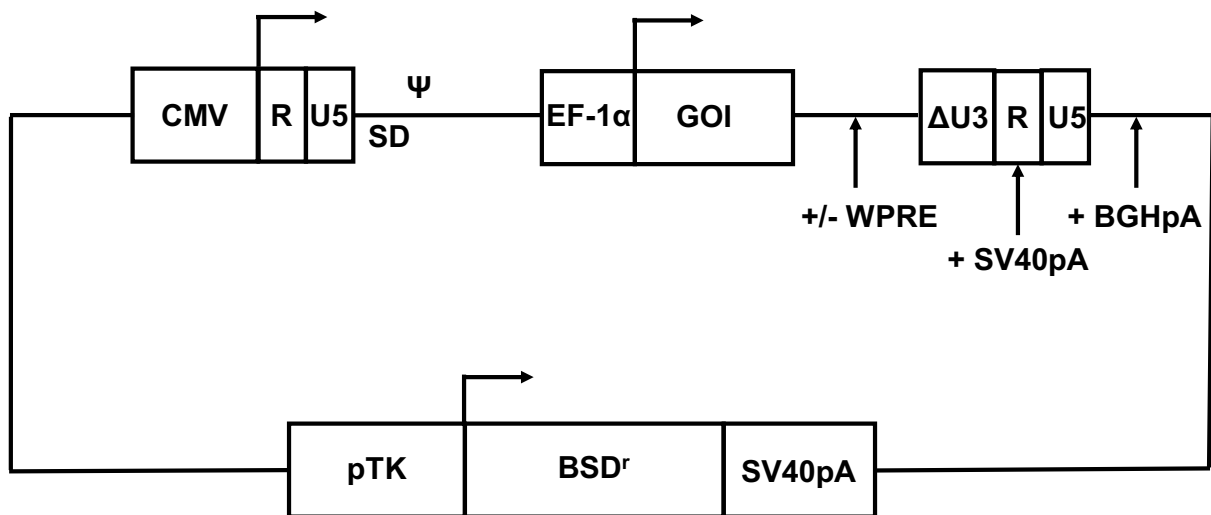

**Figure S2. Design of the final SIN vector containing the blasticidin resistant cassette.**

SIN vectors contain a gene of interest (*GOI*; *GFP*, *COL7A1* and *PIGA*) under the control of the EF-1 $\alpha$  promoter, the CMV promoter/enhancer sequence and the two poly(A) sequences (SV40pa and BGHpA). WPRE was present only in the GFP and PIGA vectors. SD and  $\Psi$  are splice donor site and packaging signal sequence, respectively. In the resistant cassette, the *BSD<sup>r</sup>* gene was under the control of the herpes simplex virus thymidine kinase promoter (HSV-TK). A SV40pa was located downstream the *BSD<sup>r</sup>* gene.

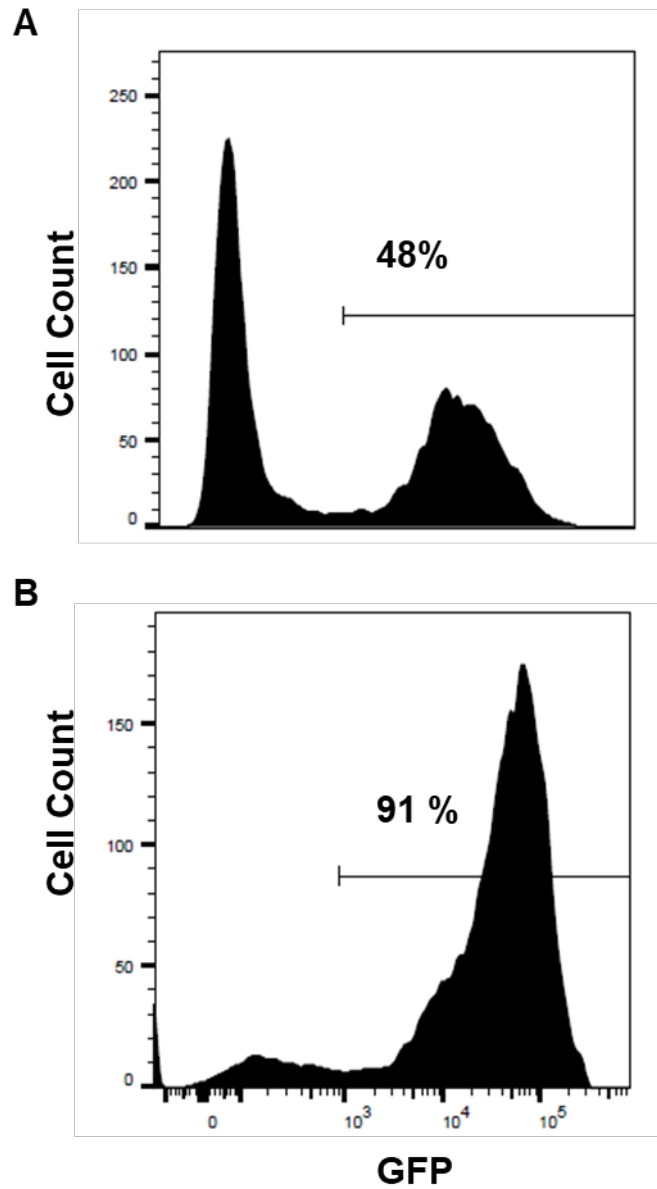

**Figure S3. GFP fluorescence of 293Vec-RD114 transfected with the SINVec.GFP plasmid.** (A) Cells selected in hygromycin and (B) in blasticidin were analyzed by FACS for GFP fluorescence. Displayed is the result of one representative experiment done three times.

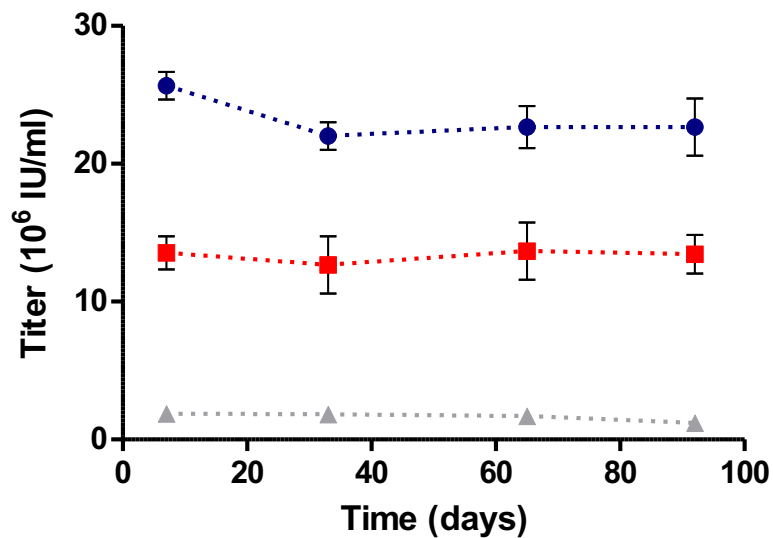

**Figure S4. Long-term stability of SIN vector production from stable vector producer clones.** Titers were measured by FACS analysis as described in the Materials and Methods section after infection of HT-1080 cells with the SINVec.GFP vector (blue) and the SINVec.COL7A1 (-W) (grey). The SINVec.PIGA vector (red) was titered on K562(PIG-). The SIN GFP, COL7A1 and PIGA vector producer clones had 8, 7 and 4 plasmid copies/cell integrated, respectively. Values presented are the mean of one experiment done in triplicate.
